# Supplementary material for: Experimental Identification of Cross-Reacting IgG Hotspots to Predict Existing Immunity Evasion of SARS-CoV-2 Variants by a New Biotechnological Application of Phage Display
Source: MDPI journal article supplement (doi:10.3390/v16010058), 2023-12-29
Supplement: s1 [file s1]

## Supplementary material

**Supplementary Table S1. Cross-reacting IgG hot-spots in S protein of SARS-CoV-2.** Cross-reacting IgG hot spots are regions of protein frequently recognized in many variants by cross-reacting antibodies. Cross-reactions of IgG antibodies were identified by immunoprecipitation of the library containing SARS-CoV-2 variants' oligopeptides (VirScan technology). Immunoprecipitation was conducted with sera from patients hospitalized due to SARS-CoV-2 infection (Alpha or Delta). The fraction of cross-reacting variants of each oligopeptide was calculated from the total number of tested variants. Numbering consistent with the reference sequence (acc. no.: YP\_009724390.1). P-values are calculated between measured data and the statistical binomial distribution model assuming random distribution of hot-spots in a protein.

| Oligopeptides' position in reference sequence |            | Number of all tested variants | P-values (exact) |                | Hot-spot detected |               |
|-----------------------------------------------|------------|-------------------------------|------------------|----------------|-------------------|---------------|
| start                                         | end        |                               | alpha            | delta          | alpha             | delta         |
| 1                                             | 44         | 18                            | 1.0E+00          | 1.0E+00        | None              | None          |
| 20                                            | 72         | 70                            | 1.0E+00          | 1.0E+00        | None              | None          |
| 45                                            | 99         | 173                           | 1.0E+00          | 1.0E+00        | None              | None          |
| 73                                            | 127        | 124                           | 1.0E+00          | 1.0E+00        | None              | None          |
| 100                                           | 154        | 74                            | 1.0E+00          | 1.0E+00        | None              | None          |
| 128                                           | 182        | 29                            | 1.0E+00          | 1.0E+00        | None              | None          |
| 155                                           | 210        | 96                            | 1.0E+00          | 1.0E+00        | None              | None          |
| 183                                           | 235        | 137                           | 1.0E+00          | 1.0E+00        | None              | None          |
| 211                                           | 256        | 165                           | 1.0E+00          | 1.0E+00        | None              | None          |
| 236                                           | 281        | 106                           | 1.0E+00          | 1.0E+00        | None              | None          |
| 257                                           | 309        | 115                           | 1.0E+00          | 1.0E+00        | None              | None          |
| <b>282</b>                                    | <b>337</b> | 88                            | <b>7.2E-29</b>   | <b>2.3E-23</b> | <b>Strong</b>     | <b>Strong</b> |
| 310                                           | 365        | 72                            | 1.0E+00          | 1.0E+00        | None              | None          |
| 338                                           | 393        | 66                            | 1.0E+00          | 1.0E+00        | None              | None          |
| 366                                           | 421        | 64                            | 9.7E-01          | 9.9E-01        | None              | None          |
| <b>394</b>                                    | <b>449</b> | 68                            | 2.0E-04          | 7.0E-01        | <b>Strong</b>     | None          |
| 422                                           | 477        | 103                           | 1.0E+00          | 9.3E-01        | None              | None          |
| 450                                           | 505        | 163                           | 1.0E+00          | 9.4E-01        | None              | None          |
| 478                                           | 533        | 128                           | 1.0E+00          | 1.0E+00        | None              | None          |
| 506                                           | 561        | 92                            | 1.0E+00          | 9.6E-01        | None              | None          |
| 534                                           | 589        | 111                           | <b>5.7E-03</b>   | 6.5E-01        | Weak              | None          |
| <b>562</b>                                    | <b>617</b> | 118                           | <b>4.0E-69</b>   | <b>7.2E-76</b> | <b>Strong</b>     | <b>Strong</b> |
| 590                                           | 645        | 122                           | 1.0E+00          | 1.0E+00        | None              | None          |
| 618                                           | 672        | 118                           | 1.0E+00          | 1.0E+00        | None              | None          |
| 646                                           | 696        | 171                           | 1.0E+00          | 1.0E+00        | None              | None          |
| <b>673</b>                                    | <b>724</b> | 200                           | <b>6.7E-35</b>   | 6.0E-02        | <b>Strong</b>     | None          |
| 697                                           | 752        | 127                           | 1.0E+00          | 1.0E+00        | None              | None          |
| 725                                           | 780        | 96                            | 1.0E+00          | 1.0E+00        | None              | None          |

|             |             |     |                |                |               |               |
|-------------|-------------|-----|----------------|----------------|---------------|---------------|
| 753         | 808         | 110 | 1.0E+00        | 9.5E-01        | None          | None          |
| 781         | 836         | 144 | 9.8E-01        | 7.8E-01        | None          | None          |
| 809         | 864         | 135 | 9.3E-01        | 4.5E-01        | None          | None          |
| <b>837</b>  | <b>892</b>  | 99  | 1.8E-01        | <b>5.2E-23</b> | None          | <b>Strong</b> |
| 865         | 920         | 62  | 1.0E+00        | 1.0E+00        | None          | None          |
| 893         | 948         | 84  | 1.0E+00        | 9.8E-01        | None          | None          |
| 921         | 976         | 87  | 9.9E-01        | 8.0E-02        | None          | None          |
| <b>949</b>  | <b>1004</b> | 45  | <b>3.8E-06</b> | 2.0E-01        | <b>Strong</b> | None          |
| 977         | 1032        | 51  | 1.0E+00        | 8.8E-01        | None          | None          |
| 1005        | 1060        | 61  | 1.0E+00        | 8.0E-01        | None          | None          |
| 1033        | 1088        | 101 | 5.2E-01        | 5.5E-01        | None          | None          |
| 1061        | 1116        | 121 | 1.0E+00        | 1.0E+00        | None          | None          |
| 1089        | 1144        | 122 | 1.0E+00        | 1.0E+00        | None          | None          |
| 1117        | 1172        | 135 | 1.0E+00        | 1.0E+00        | None          | None          |
| <b>1145</b> | <b>1200</b> | 137 | <b>6.0E-31</b> | <b>3.0E-19</b> | <b>Strong</b> | <b>Strong</b> |
| <b>1173</b> | <b>1228</b> | 127 | <b>4.3E-23</b> | 1.7E-01        | <b>Strong</b> | None          |
| <b>1201</b> | <b>1256</b> | 141 | <b>3.5E-23</b> | 1.0E+00        | <b>Strong</b> | None          |
| 1229        | 1273        | 96  | 1.0E+00        | 1.0E+00        | None          | None          |

**Supplementary Table S2. Cross-reacting IgG hot-spots in N protein of SARS-CoV-2.** Cross-reacting IgG hot spots are regions of protein frequently recognized in many variants by cross-reacting antibodies. Cross-reactions of IgG antibodies were identified by immunoprecipitation of the library containing SARS-CoV-2 variants' oligopeptides (VirScan technology). Immunoprecipitation was conducted with sera from patients hospitalized due to SARS-CoV-2 infection (Alpha or Delta). The fraction of cross-reacting variants of each oligopeptide was calculated from the total number of tested variants. Numbering consistent with the reference sequence (acc. no.: YP\_009724397.2). P-values are calculated between measured data and the statistical binomial distribution model assuming random distribution of hot-spots in a protein.

| Oligopeptides position in reference sequence |            | Number of all tested variants | P-values (exact) |                | Cross-reacting hot-spots |               |
|----------------------------------------------|------------|-------------------------------|------------------|----------------|--------------------------|---------------|
| start                                        | end        |                               | alpha            | delta          | alpha                    | delta         |
| 1                                            | 56         | 243                           | 1.0E+00          | 1.0E+00        | None                     | None          |
| 29                                           | 81         | 189                           | 1.0E+00          | 9.3E-01        | None                     | None          |
| <b>57</b>                                    | <b>109</b> | 129                           | 9.9E-01          | <b>5.4E-05</b> | None                     | <b>Strong</b> |
| 82                                           | 137        | 89                            | 1.0E+00          | 1.0E+00        | None                     | None          |
| 110                                          | 165        | 126                           | 1.0E+00          | 1.0E+00        | None                     | None          |
| <b>138</b>                                   | <b>193</b> | 186                           | <b>1.5E-09</b>   | <b>8.1E-03</b> | <b>Strong</b>            | Weak          |
| <b>166</b>                                   | <b>220</b> | 549                           | <b>2.0E-41</b>   | 1.0E+00        | <b>Strong</b>            | None          |
| 194                                          | 245        | 562                           | 1.0E+00          | 1.0E+00        | None                     | None          |
| <b>221</b>                                   | <b>273</b> | 184                           | <b>2.0E-28</b>   | <b>5.3E-50</b> | <b>Strong</b>            | <b>Strong</b> |
| 246                                          | 301        | 123                           | 9.7E-01          | 9.5E-01        | None                     | None          |
| 274                                          | 329        | 103                           | 1.0E+00          | 1.0E+00        | None                     | None          |
| 302                                          | 357        | 112                           | 1.0E+00          | 1.0E+00        | None                     | None          |
| 330                                          | 377        | 141                           | 1.0E+00          | 1.0E+00        | None                     | None          |
| <b>358</b>                                   | <b>404</b> | 272                           | <b>1.2E-04</b>   | <b>1.0E-11</b> | <b>Strong</b>            | <b>Strong</b> |
| <b>378</b>                                   | <b>419</b> | 173                           | <b>1.9E-06</b>   | 8.7E-03        | <b>Strong</b>            | Weak          |

**Supplementary Table S3. Immunogenicity and cross-reacting IgG hot-spots for M and E protein.** Immunogenicity and cross-reactivity were detected by VirScan technology in sera of patients hospitalized due to alpha or delta variant SARS-CoV-2 infection. Below is presented the fraction of patients immunized to a region of reference SARS-CoV-2 protein that recognized the given region significantly more strongly. Also, we show a fraction of protein variants recognized by tested sera for each tested region of proteins. Red shows detected cross-reacting IgG hot spot – regions of protein that in multiple, natural proteins' variants were efficiently bound by antibodies induced by tested sera.

| Protein name     | Tested oligopeptides' position in ref. sequence [aa no.] | No. of variants tested | Fraction of patients immunized to a region [%] |       | Fraction of protein variants recognized by tested sera [%] |       |
|------------------|----------------------------------------------------------|------------------------|------------------------------------------------|-------|------------------------------------------------------------|-------|
|                  |                                                          |                        | alpha                                          | delta | alpha                                                      | delta |
| <b>M-protein</b> | start                                                    |                        |                                                |       |                                                            |       |
|                  | 1                                                        | 65                     | 26.7                                           | 50.0  | 6.2                                                        | 4.6   |
|                  | 29                                                       | 100                    | 13.3                                           | 0.0   | 21.0                                                       | 3.0   |
|                  | 57                                                       | 85                     | 0.0                                            | 0.0   | 5.9                                                        | 0.0   |
|                  | 85                                                       | 77                     | 0.0                                            | 0.0   | 0.0                                                        | 0.0   |
|                  | 113                                                      | 27                     | 26.7                                           | 50.0  | 0.0                                                        | 0.0   |
|                  | 143                                                      | 78                     | 0.0                                            | 0.0   | 1.3                                                        | 0.0   |
|                  | 171                                                      | 61                     | 20.0                                           | 25.0  | 0.0                                                        | 0.0   |
|                  | 199                                                      | 61                     | 0.0                                            | 0.0   | 4.9                                                        | 1.6   |
| <b>E-protein</b> | 1                                                        | 88                     | 0.0                                            | 0.0   | 0.0                                                        | 0.0   |
|                  | 29                                                       | 61                     | 0.0                                            | 0.0   | 0.0                                                        | 0.0   |
|                  | 57                                                       | 85                     | 0.0                                            | 0.0   | 0.0                                                        | 0.0   |

**Supplementary Table S4. Immunogenic regions of SARS-CoV-2 protein N.** Immunogenic regions efficiently induce specific IgG production in SARS-CoV-2 infected patients. Immunogenic regions were identified by immunoprecipitation of the oligopeptide library representing Alpha and Delta SARS-CoV-2 variants (VirScan technology). Immunoprecipitation was conducted with sera from patients hospitalized due to SARS-CoV-2 infection (Alpha or Delta). Red color represents regions of high and very high immunogenicity ( $p < 0.05$  and  $p < 0.001$ , respectively). Blue color represents regions of low immunogenicity ( $p < 0.05$ ). P-value calculated between experimental data and statistical binomial distribution model assuming random distribution of hot-spot regions in proteins.

| Oligopeptides' position in reference sequence |            | P-values (exact) |                | Immunogenicity   |             |
|-----------------------------------------------|------------|------------------|----------------|------------------|-------------|
| start                                         | end        | alpha            | delta          | alpha            | delta       |
| <b>1</b>                                      | <b>56</b>  | <b>1.0E-02</b>   | 4.9E-01        | <b>Low</b>       | Medium      |
| 29                                            | 84         | 1.4E-01          | 2.5E-01        | Medium           | Medium      |
| 57                                            | 112        | 3.0E-01          | 4.9E-01        | Medium           | Medium      |
| <b>85</b>                                     | <b>140</b> | <b>1.1E-03</b>   | <b>8.8E-03</b> | <b>Low</b>       | <b>Low</b>  |
| 113                                           | 168        | 1.4E-01          | 7.0E-02        | Medium           | Medium      |
| 141                                           | 196        | 4.9E-01          | 2.5E-01        | Medium           | Medium      |
| 169                                           | 224        | 3.0E-01          | 5.1E-01        | Medium           | Medium      |
| <b>197</b>                                    | <b>252</b> | 5.1E-01          | <b>2.0E-02</b> | Medium           | <b>High</b> |
| <b>225</b>                                    | <b>280</b> | <b>9.9E-05</b>   | 9.0E-02        | <b>Very High</b> | Medium      |
| 253                                           | 308        | 5.1E-01          | 4.9E-01        | Medium           | Medium      |
| 281                                           | 336        | 1.4E-01          | 4.9E-01        | Medium           | Medium      |
| <b>309</b>                                    | <b>364</b> | <b>1.1E-03</b>   | 7.0E-02        | <b>Low</b>       | Medium      |
| 337                                           | 392        | 5.1E-01          | 2.3E-01        | Medium           | Medium      |
| <b>365</b>                                    | <b>419</b> | <b>2.9E-07</b>   | <b>1.7E-02</b> | <b>Very High</b> | <b>High</b> |

**Supplementary Table S5: Immunogenic regions in protein S.** Immunogenic regions efficiently induce specific IgG production in SARS-CoV-2 infected patients. Immunogenic regions were identified by immunoprecipitation of the oligopeptide library representing Alpha and Delta SARS-CoV-2 variants (VirScan technology). Immunoprecipitation was conducted with sera from patients hospitalized due to SARS-CoV-2 infection (Alpha or Delta). Red color represents regions of high and very high immunogenicity ( $p < 0.05$  and  $p < 0.001$ , respectively). Blue color represents regions of low immunogenicity ( $p < 0.05$ ). P-value calculated between experimental data and statistical binomial distribution model assuming random distribution of hot-spot regions in proteins.

| Oligopeptides' position in reference sequence |            | P-values (exact) |                | Immunogenicity   |             |
|-----------------------------------------------|------------|------------------|----------------|------------------|-------------|
| start                                         | end        | alpha            | delta          | alpha            | delta       |
| <b>1</b>                                      | <b>56</b>  | <b>0.0E+00</b>   | <b>5.0E-02</b> | <b>Low</b>       | <b>Low</b>  |
| <b>29</b>                                     | <b>84</b>  | <b>3.0E-02</b>   | <b>5.0E-02</b> | <b>Low</b>       | <b>Low</b>  |
| <b>57</b>                                     | <b>112</b> | 1.0E-01          | <b>5.0E-02</b> | Medium           | <b>Low</b>  |
| <b>85</b>                                     | <b>140</b> | <b>3.0E-02</b>   | <b>5.0E-02</b> | <b>Low</b>       | <b>Low</b>  |
| <b>113</b>                                    | <b>168</b> | <b>0.0E+00</b>   | <b>5.0E-02</b> | <b>Low</b>       | <b>Low</b>  |
| <b>141</b>                                    | <b>196</b> | <b>0.0E+00</b>   | <b>5.0E-02</b> | <b>Low</b>       | <b>Low</b>  |
| <b>169</b>                                    | <b>224</b> | 4.7E-01          | <b>1.6E-02</b> | Medium           | <b>High</b> |
| 197                                           | 252        | 5.3E-01          | 2.2E-01        | Medium           | Medium      |
| <b>225</b>                                    | <b>280</b> | <b>0.0E+00</b>   | 2.2E-01        | <b>Low</b>       | Medium      |
| 253                                           | 308        | 1.0E-01          | 2.2E-01        | Medium           | Medium      |
| <b>281</b>                                    | <b>336</b> | <b>1.5E-05</b>   | <b>1.6E-02</b> | <b>Very High</b> | <b>High</b> |
| 309                                           | 364        | 4.7E-01          | 2.2E-01        | Medium           | Medium      |
| 337                                           | 392        | 2.6E-01          | 2.2E-01        | Medium           | Medium      |
| 365                                           | 420        | 5.3E-01          | 5.0E-01        | Medium           | Medium      |
| 393                                           | 448        | 1.6E-01          | 5.0E-01        | Medium           | Medium      |
| 421                                           | 476        | 2.6E-01          | 5.0E-01        | Medium           | Medium      |
| <b>449</b>                                    | <b>504</b> | <b>3.0E-02</b>   | 5.0E-01        | <b>Low</b>       | Medium      |
| <b>477</b>                                    | <b>532</b> | <b>3.0E-02</b>   | 2.2E-01        | <b>Low</b>       | Medium      |
| 505                                           | 560        | 1.6E-01          | 5.0E-01        | Medium           | Medium      |
| <b>533</b>                                    | <b>588</b> | <b>5.3E-03</b>   | 5.0E-01        | <b>High</b>      | Medium      |
| <b>561</b>                                    | <b>616</b> | <b>1.0E-03</b>   | 7.0E-02        | <b>High</b>      | Medium      |
| <b>589</b>                                    | <b>644</b> | <b>3.0E-02</b>   | 2.2E-01        | <b>Low</b>       | Medium      |
| 617                                           | 672        | 1.0E-01          | 5.0E-01        | Medium           | Medium      |
| 645                                           | 700        | 1.0E-01          | 2.2E-01        | Medium           | Medium      |
| 673                                           | 728        | 2.0E-02          | 2.3E-01        | Medium           | Medium      |
| <b>701</b>                                    | <b>756</b> | <b>0.0E+00</b>   | 7.0E-02        | <b>Very High</b> | Medium      |
| 729                                           | 784        | 2.6E-01          | 2.2E-01        | Medium           | Medium      |
| <b>757</b>                                    | <b>812</b> | 6.0E-02          | <b>1.6E-02</b> | Medium           | <b>High</b> |

|             |             |                |                |                  |             |
|-------------|-------------|----------------|----------------|------------------|-------------|
| <b>785</b>  | <b>840</b>  | <b>1.5E-04</b> | <b>2.0E-03</b> | <b>Very High</b> | <b>High</b> |
| <b>813</b>  | <b>868</b>  | <b>1.0E-03</b> | <b>2.0E-03</b> | <b>High</b>      | <b>High</b> |
| 841         | 896         | 5.3E-01        | 5.0E-01        | Medium           | Medium      |
| <b>869</b>  | <b>924</b>  | <b>0.0E+00</b> | <b>5.0E-02</b> | <b>Low</b>       | <b>Low</b>  |
| 897         | 952         | 5.3E-01        | 2.3E-01        | Medium           | Medium      |
| <b>925</b>  | <b>980</b>  | <b>5.3E-03</b> | <b>1.6E-02</b> | <b>High</b>      | <b>High</b> |
| 953         | 1008        | 5.3E-01        | 2.3E-01        | Medium           | Medium      |
| 981         | 1036        | 2.6E-01        | 2.3E-01        | Medium           | Medium      |
| <b>1009</b> | <b>1064</b> | <b>0.0E+00</b> | 5.0E-01        | <b>Low</b>       | Medium      |
| 1037        | 1092        | 4.7E-01        | 5.0E-01        | Medium           | Medium      |
| 1065        | 1120        | 6.0E-02        | 5.0E-01        | Medium           | Medium      |
| 1093        | 1148        | 1.0E-01        | 2.2E-01        | Medium           | Medium      |
| <b>1121</b> | <b>1176</b> | 1.0E-01        | <b>5.0E-02</b> | Medium           | <b>Low</b>  |
| <b>1149</b> | <b>1204</b> | <b>9.6E-07</b> | <b>2.0E-03</b> | <b>Very High</b> | <b>High</b> |
| <b>1177</b> | <b>1232</b> | <b>1.5E-05</b> | <b>2.0E-03</b> | <b>Very High</b> | <b>High</b> |
| <b>1205</b> | <b>1260</b> | <b>3.0E-02</b> | 2.2E-01        | <b>Low</b>       | Medium      |
| <b>1233</b> | <b>1273</b> | <b>0.0E+00</b> | <b>5.0E-02</b> | <b>Low</b>       | <b>Low</b>  |

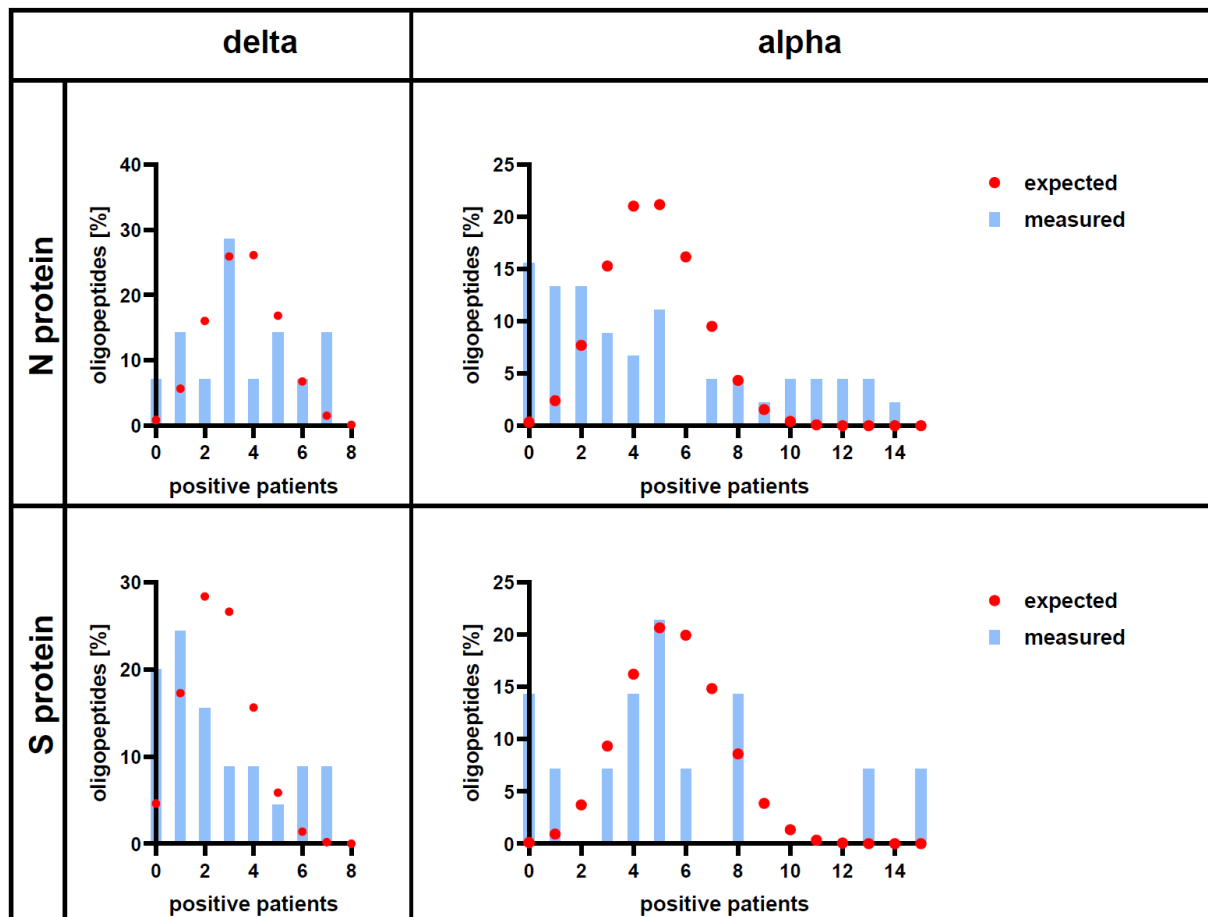

**Figure S1. Comparison of binomial distribution model and experimental results of testing proteins' S&N immunogenicity.** X-axis shows the number of patients in a tested group (hospitalized for Alpha or Delta variant) whose sera bind the same oligopeptide. Y-axis shows the expected chance of a given number of patients testing positive for the same, given oligopeptide. Blue bars represent measured, experimental frequencies of the given number of positive patients. Red dots represent the chance that measuring this specific number of patients testing positive would occur randomly (binomial distribution model).
